# Supplementary material for: Variation in Methylmercury Metabolism and Elimination in Humans: Physiological Pharmacokinetic Modeling Highlights the Role of Gut Biotransformation, Skeletal Muscle, and Hair
Source: Oxford University Press journal article supplement (doi:10.1093/toxsci/kfaa192), 2021-01-09
Supplement: kfaa192_supplementary_data.zip [file kfaa192_supplementary_data.zip]

```
In[ ]:= ClearAll[Evaluate[Context[] <> "*"]]
```

```
In[147]:= (*Part 1 - constant definitions *)
```

```
(*System schema:*)
```

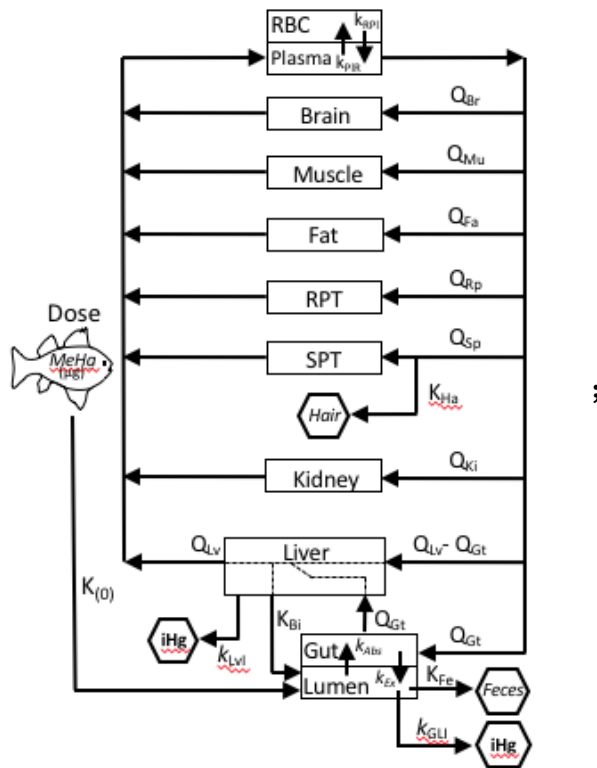

```
child = 1;
```

```
adultMale = 2;
```

```
adultFemale = 3;
```

```
currentTarget = adultFemale;
```

```
(*Edit this to change the target demographic of the model*)
```

```
OrganScaleFactor[bodyMass_] :=
```

```
OrganScaleFactor[bodyMass] = bodyMass1/weightArray[[currentTarget]]1;
```

```
FlowScaleFactor[bodyMass_] := FlowScaleFactor[bodyMass] =
```

```
bodyMass0.75/weightArray[[currentTarget]]0.75;
```

```
RateScaleFactor[bodyMass_] := RateScaleFactor[bodyMass] =
```

```
bodyMass-0.25/weightArray[[currentTarget]]-0.25;
```

```
targetWeight = 60; (*kg,
```

```
the weight of the person to whom we are applying the model*)
```

```
weightArray = {19.0, 73.0, 60.0}; (*"Average" weight for child, man, woman*)
```

```
(* Organ Volumes (L)*)
```

```
totalRichlyPerfusedVolArray = {1.00, 3.72, 2.87} OrganScaleFactor[targetWeight];
```

```
totalSlowlyPerfusedVolArray = {0.7, 4.0, 4.0} OrganScaleFactor[targetWeight];
```

```
brainVolArray = {1.39, 1.34, 1.20} OrganScaleFactor[targetWeight];
```

```
kidneyVolArray = {0.09, 0.32, 0.26} OrganScaleFactor[targetWeight];
```

```
fatVolArray = {3.60, 14.60, 18.00} OrganScaleFactor[targetWeight];
```

```
liverVolArray = {0.50, 1.57, 1.35} OrganScaleFactor[targetWeight];
```

```
gutVolArray = {0.28, 1.23, 1.17} OrganScaleFactor[targetWeight];
```

```
lumenVolArray = {0.30, 0.9, 0.83} OrganScaleFactor[targetWeight];
```

```
(*from ICRP 89 pg. 132 *)
```

```
plasmaVolArray = {0.97, 3.46, 2.68} OrganScaleFactor[targetWeight]
```

```
bloodcellVolArray = {0.49, 2.36, 1.46} OrganScaleFactor[targetWeight]
```

```
skeletalMuscleVolArray = {4.9, 32, 21} OrganScaleFactor[targetWeight];
```

```
(* Plasma Flow values for various organs (L/hr) * *Note,
```

```
(VPl/(VPl+VRbc)) is the plasma volume fraction. The '60' is for
```

```
a conversion from minutes to hours, (from Price et al. 2003)*)
```

```
totalRichlyPerfusedFlowArray =
```

```
(VPl / (VPl + VRbc)) 60 {0.77, 2.60, 2.21} FlowScaleFactor[targetWeight];
```

```
totalSlowlyPerfusedFlowArray = (VPl / (VPl + VRbc)) 60
```

```
{0.02, 0.12, 0.12} FlowScaleFactor[targetWeight];
```

```
brainFlowArray = (VPl / (VPl + VRbc)) 60 {0.72, 0.68, 0.63}
```

```
FlowScaleFactor[targetWeight];
```

```
kidneyFlowArray = (VPl / (VPl + VRbc)) 60 {0.33, 0.17, 0.85}
```

```
FlowScaleFactor[targetWeight];
```

```
liverFlowArray = (VPl / (VPl + VRbc)) 60 {0.46, 1.32, 1.35}
```

```
FlowScaleFactor[targetWeight];
```

```
gutFlowArray = (VPl / (VPl + VRbc)) 60 {0.22, 0.93, 0.91}
```

```
FlowScaleFactor[targetWeight];
```

```
skeletalMuscleFlowArray = (VPl / (VPl + VRbc)) 60
```

```
{0.15, 0.95, 0.63} FlowScaleFactor[targetWeight];
```

```
fatFlowArray = (VPl / (VPl + VRbc)) 60 {0.11, 0.29, 0.54} FlowScaleFactor[targetWeight];
```

```
(*Total Fat values from Price et al. 2003*)
```

```
(*Partition Coefficients for MeHg (unit-less),
```

```
X 10 to convert blood value to plasma value*)
```

```
PBr = 10 × 3;
```

```
PMu = 10 × 2; (*Not given explicitly by Clewell;
```

```
using the value for slowly perfused tissue.*)
```

```
PRp = 10 × 1;
```

```

PSp = 10 × 2;
PLv = 10 × 5;
PGt = 10 × 1;
PKi = 10 × 4;
PFa = 10 × 0.15; (*Clewell, personal comm.*)
PHa = 10 × 300; (*MR calculation 8/1/20*)

(*Kinetic Parameters (K = L/hr, k = /hr; inferred from model fitting*)
KFeArray = {0.00208, 0.00625, 0.005} FlowScaleFactor[targetWeight];
(* From ICRP Pub 89,p.130 *)

KHaArray = {0.0000228, 0.0000399, 0.0000336} FlowScaleFactor[targetWeight];
(* From MR calculation 8/1/30; units are L/hr*)

"KBi : "
KBi = 0.00035 ( liverVolArray [[currentTarget]]) 1000
(*this is for flow of MeHg from liver to intestinal lumen. effectively
  a "clearance" value. Male:0.55 L/hr for liver of size 1.57L (1570gm);
  0.00035L/hr/gm liver. A multiplier of 1000 is
  needed to convert liver volumes from L to g*)

"kGLI : "
kGLI = 0.08 RateScaleFactor[targetWeight]

"KFe : "
KFe = KFeArray[[currentTarget]]

"KHa : "
KHa = KHaArray[[currentTarget]]
(*flow of hair out of system, MR calculation 8/10/20*)

"kLvI : "
kLvI = 0.001 RateScaleFactor[targetWeight]

kAbs = 0.3 RateScaleFactor[targetWeight];

kEx = 0.10 RateScaleFactor[targetWeight];

(*Oral absorption half-life,
going from consumption to entry into the intestine (units=hr):*)
AbsorptionHalfLife = 1/10;

Time = 50 * 24; (* x 24 hours = days*)

```

```
Ymax = 10;
```

```
n = 1; (*number of doses*)
```

```
doseDelay = 7 * 24; (*defines one dose every 7 days*)
```

```
NmanipSlowDoses[t_, n_, doseDelay_, Dose_, AbsorptionHalfLife_] :=
```

$$\text{Dose} \sum_{i=0}^{\text{IntegerPart}[n]-1} \partial_t \left( 1 - \left( \frac{1}{2} \right)^{\frac{t-i \text{doseDelay}}{\text{AbsorptionHalfLife}}} \right) \text{HeavisideTheta}[t - i \text{doseDelay}]$$

```
(*The values we define below are what will actually be used in the model. This way, they're automatically updated when we change "currentTarget"*)
```

```
weight = weightArray[[currentTarget]];
```

```
VBr = brainVolArray[[currentTarget]];
```

```
VKi = kidneyVolArray[[currentTarget]];
```

```
VLv = liverVolArray[[currentTarget]];
```

```
VGt = gutVolArray[[currentTarget]];
```

```
VGL = lumenVolArray[[currentTarget]];
```

```
VPl = plasmaVolArray[[currentTarget]];
```

```
VMu = skeletalMuscleVolArray[[currentTarget]];
```

```
VFu = fatVolArray[[currentTarget]];
```

```
VRbc = bloodcellVolArray[[currentTarget]];
```

```
VRp = totalRichlyPerfusedVolArray[[currentTarget]];
```

```
VSp = totalSlowlyPerfusedVolArray[[currentTarget]];
```

```
QBr = brainFlowArray[[currentTarget]];
```

```
QKi = kidneyFlowArray[[currentTarget]];
```

```
QFu = fatFlowArray[[currentTarget]];
```

```
QLv = liverFlowArray[[currentTarget]];
```

```
QGt = gutFlowArray[[currentTarget]];
```

```
QMu = skeletalMuscleFlowArray[[currentTarget]];
```

```
QRp = totalRichlyPerfusedFlowArray[[currentTarget]];
```

```
QSp = totalSlowlyPerfusedFlowArray[[currentTarget]];
```

```
"fromRBCToPlasma : "
```

```
kRPl = 0.3 RateScaleFactor[targetWeight];
```

```
"fromPlasmaToRBC : "
```

```
kPlR = 3 RateScaleFactor[targetWeight];
```

```
(*Part 2 - Model definition: *)
```

```

SystemSolutionAndTime = AbsoluteTiming[NDSolve[{
  (* 16 *)
  ARBC'[t] == -kRPl ARBC[t] + kPlR APl[t],
  ARBC[0] == 0,

  (* 1 *)
  APl'[t] == (QLv  $\frac{ALv[t]}{VLv PLv}$  - (QLv - QGt)  $\frac{APl[t]}{VPl}$ ) +
    QBr ( $\frac{ABr[t]}{VBr PBr}$  -  $\frac{APl[t]}{VPl}$ ) + QSp ( $\frac{ASp[t]}{VSp PSp}$  -  $\frac{APl[t]}{VPl}$ ) + QRp ( $\frac{ARp[t]}{VRp PRp}$  -  $\frac{APl[t]}{VPl}$ ) +
    QKi ( $\frac{AKi[t]}{VKi PKi}$  -  $\frac{APl[t]}{VPl}$ ) + QMu ( $\frac{AMu[t]}{VMu PMu}$  -  $\frac{APl[t]}{VPl}$ ) + QFa ( $\frac{AFa[t]}{VF a PFa}$  -  $\frac{APl[t]}{VPl}$ ) -
    QGt  $\frac{APl[t]}{VPl}$  + kRPl (ARBC[t]) - kPlR (APl[t]) - KHa ( $\frac{APl[t]}{VPl}$ ) PHa,
  APl[0] == 0,

  (* 2 *)
  ABr'[t] == -QBr ( $\frac{ABr[t]}{VBr PBr}$  -  $\frac{APl[t]}{VPl}$ ),
  ABr[0] == 0,

  (* 3 *)
  AMu'[t] == -QMu ( $\frac{AMu[t]}{VMu PMu}$  -  $\frac{APl[t]}{VPl}$ ),
  AMu[0] == 0,

  (* 4 *)
  AFa'[t] == -QFa ( $\frac{AFa[t]}{VF a PFa}$  -  $\frac{APl[t]}{VPl}$ ),
  AFa[0] == 0,

  (* 5 *)
  ARp'[t] == -QRp ( $\frac{ARp[t]}{VRp PRp}$  -  $\frac{APl[t]}{VPl}$ ),
  ARp[0] == 0,

  (* 6 *)
  ASp'[t] == -QSp ( $\frac{ASp[t]}{VSp PSp}$  -  $\frac{APl[t]}{VPl}$ ),
  ASp[0] == 0,

  (* 7 *)
  ALv'[t] ==
    - ( $\frac{QLv ALv[t]}{VLv PLv}$  - (QLv - QGt)  $\frac{APl[t]}{VPl}$  - QGt  $\frac{AGt[t]}{VGt PGt}$ ) - KBi  $\frac{APl[t]}{VPl}$  - kLvI ALv[t],

```

ALv[0] == 0,

(\* 8 \*)

$AGt'[t] == -QGt \left( \frac{AGt[t]}{VGt PGt} - \frac{APl[t]}{VPl} \right) + kAbs AGL[t] - kEx AGt[t],$

AGt[0] == 0,

(\* 9 \*\*NOTE: THE DOSE AMOUNT IN THIS LINE\*\* \*)

$AGL'[t] == KBi \frac{APl[t]}{VPl} - kAbs AGL[t] - KFe \frac{AGL[t]}{VGL} +$

$NmanipSlowDoses[t, n, doseDelay, 42.0(*dose amount,$   
 $\mu g \text{ MeHg*}), AbsorptionHalfLife] - kGLI AGL[t] + kEx AGt[t],$   
 AGL[0] == 0,

(\* 10 \*)

$AKi'[t] == -QKi \left( \frac{AKi[t]}{VKi PKi} - \frac{APl[t]}{VPl} \right),$

AKi[0] == 0,

(\* 11 \*)

$AIHGurine'[t] == kLvI ALv[t],$

AIHGurine[0] == 0,

(\* 12 \*)

$AIHGfeces'[t] == kGLI AGL[t],$

AIHGfeces[0] == 0,

(\* 13 \*)

$AMeHgfeces'[t] == KFe \frac{AGL[t]}{VGL},$

AMeHgfeces[0] == 0,

(\* 14 \*)

$ABiTransTot'[t] == KBi \frac{APl[t]}{VPl},$

ABiTransTot[0] == 0,

(\* 15 \*)

$AGtTransTot'[t] == kEx AGt[t],$

AGtTransTot[0] == 0,

(\* 17 \*)

$AHa'[t] == KHa \frac{APl[t]}{VPl} PHa,$

```

      AHa[0] == 0
    },
    {(* 1 *)APL,
     (* 2 *)ABr,
     (* 3 *)AMu,
     (* 4 *)AFa,
     (* 5 *)ARp,
     (* 6 *)ASp,
     (* 7 *)ALv,
     (* 8 *)AGt,
     (* 9 *)AGL,
     (* 10 *)AKi,
     (* 11 *)AIHGurine,
     (* 12 *)AIHGfeces,
     (* 13 *)AMeHgfeces,
     (* 14 *)ABiTransTot,
     (* 15 *)AGtTransTot,
     (* 16 *)ARBC,
     (* 17 *)AHA

    }, {t, 0, 42000}, SolveDelayed → True, WorkingPrecision → MachinePrecision]]];
Text["Time taken to solve system:"]
SystemSolutionAndTime[[1]]
SystemSolution = SystemSolutionAndTime[[2]];

```

Out[161]= {0.97, 3.46, 2.68}

Out[162]= {0.49, 2.36, 1.46}

Out[177]= KBi :

Out[178]= 0.4725

Out[179]= kGLI :

Out[180]= 0.08

Out[181]= KFe :

Out[182]= 0.005

Out[183]= KHa :

Out[184]= 0.0000336

Out[185]= kLvI :

Out[186]= 0.001

Out[212]= fromRBCToplasma :

Out[214]= fromplasmaToRBC :

Out[217]= Time taken to solve system:

Out[218]= 0.09183

In[236]:= (\*Part 3 - Model analysis

Now that the system takes a few minutes to solve,  
it's best if we separate out the analysis from the system solution,  
so we don't have to re-solve the system every time\*)

```
Plot[{
  Evaluate[ABr[t] /. SystemSolution[[1]][2]] / VBr,
  (Evaluate[APl[t] /. SystemSolution[[1]][1]] +
   Evaluate[ARBC[t] /. SystemSolution[[1]][16]]) / (VRbc + VPl),
  Evaluate[AMu[t] /. SystemSolution[[1]][3]] / VMu,
  Evaluate[AFa[t] /. SystemSolution[[1]][4]] / VFa
}, {t, 0, Time},
AxesLabel → {"Time (hours)", "Concentration (Amount/L of compartment)"},
PlotLegends → {"Brain", "Blood", "Muscle", "Fat"},
ImageSize → Medium, PlotLabel → "Amount of Dose in Each Compartment",
PlotStyle → {Purple, Red, Green, Yellow}, PlotRange → {0, 3}, PlotPoints → 200]
```

```
Plot[{
  (Evaluate[APl[t] /. SystemSolution[[1]][1]] +
   Evaluate[ARBC[t] /. SystemSolution[[1]][16]]) / (VRbc + VPl)
}, {t, 0, Time},
AxesLabel → {"Time (hours)", "Concentration (MeHg (μg/L))"},
PlotLegends → {"MeHg in Blood"},
ImageSize → Medium, PlotLabel → "Blood Concentraion of MeHg",
PlotStyle → {Blue}, PlotRange → {0, 0.6}, PlotPoints → 200]
```

```
Plot[{
  Evaluate[APl[t] /. SystemSolution[[1]][1]] / VPl,
  Evaluate[ARBC[t] /. SystemSolution[[1]][16]] / VRbc,
  (Evaluate[APl[t] /. SystemSolution[[1]][1]] +
   Evaluate[ARBC[t] /. SystemSolution[[1]][16]]) / (VRbc + VPl)
}, {t, 0, Time},
AxesLabel → {"Time (hours)", "Concentration (Amount/L of compartment)"},
PlotLegends → {"Plasma", "RBC", "Blood",},
ImageSize → Medium, PlotLabel → "Amount of Dose in Each Compartment",
PlotStyle → {Orange, Purple, Red}, PlotRange → {0, 2}, PlotPoints → 200]
```



```
Plot[{
  Evaluate[ALv[t] /. SystemSolution[[1]][[7]]] / VLv,
  Evaluate[AGt[t] /. SystemSolution[[1]][[8]]] / VGt,
  Evaluate[AKi[t] /. SystemSolution[[1]][[10]]] / VKi
}, {t, 0, Time},
AxesLabel → {"Time (hours)", "Concentration (Amount/L of compartment)"},
PlotLegends → {"Liver", "Gut", "Kidney"},
ImageSize → Medium, PlotLabel → "Amount of Dose in Each Compartment",
PlotStyle → {Blue, Brown, Pink}, PlotRange → {0, 10}, MaxRecursion → 7]
```

```
Plot[{
  Evaluate[AGL[t] /. SystemSolution[[1]][[9]]] / VGL
}, {t, 0, Time},
AxesLabel → {"Time (hours)", "Concentration (Amount/L of compartment)"},
PlotLegends → {"Gut Lumen"},
ImageSize → Medium, PlotLabel → "Amount of Dose in Each Compartment",
PlotStyle → {{DotDashed, Thick, Brown}}, PlotRange → {0, 60}, MaxRecursion → 9]
```

```
Plot[{
  Evaluate[AIHGfeces[t] /. SystemSolution[[1]][[12]]] / 51.1,
  Evaluate[AHa[t] /. SystemSolution[[1]][[17]]] / 51.1,
  Evaluate[AIHGurine[t] /. SystemSolution[[1]][[11]]] / 51.1,
  Evaluate[AMeHgfeces[t] /. SystemSolution[[1]][[13]]] / 51.1
}, {t, 0, Time},
AxesLabel → {"Time (hours)", "Amount"},
PlotLegends → {"iHg feces", "MeHg hair", "iHg urine", "MeHg feces"},
ImageSize → Medium,
PlotLabel → "fraction of dose Eliminated Through Each Outflow",
PlotStyle → {{Brown}, {Black}, {Dotted, Red}, {Dotted, Brown}},
PlotRange → {0, 1}]
```

```
Plot[ $\frac{\text{Evaluate}[AGtTransTot[t] /. \text{SystemSolution}[[1]][[15]]]}{\text{Evaluate}[ABiTransTot[t] /. \text{SystemSolution}[[1]][[14]]]}$ , {t, 0, Time},
AxesLabel → {"Time (hours)", "Ratio"}, PlotLegends → {"Gut:Bile"},
ImageSize → Medium, PlotLabel → "Relative input to gut lumen", PlotRange → {0, 10}]
```

(\* this is used for half-life calculation\*)

```
goodTime = ndoseDelay + 2000;
```

```
Text["Elimination half-life for the blood compartment in days: "]
```

```
(NMinimize[{(Evaluate[APL[t] /. SystemSolution[[1]][[1]] -
  0.5 Evaluate[APL[goodTime] /. SystemSolution[[1]][[1]])^2,
```

```
t > goodTime}, t][[2]][[1]][[2]] - goodTime)/24
```

```
LogPlot[Evaluate[APL[t] /. SystemSolution[[1]][[1]]], {t, goodTime, 5 goodTime},
  PlotLabel → "Log Plot of Blood Concentration During Elimination Phase",
  ImageSize → Medium,
  AxesLabel → {"Time (hours)", "Blood Concentration (Amount/L of Compartment)"}]
Text["Half-life of blood concentration as calculated by best fit for log data:"]
```

```
modelFit = LinearModelFit[Table[Log[Evaluate[APL[i] /. SystemSolution[[1]][[1]]],
  {i, n doseDelay, n doseDelay + 50}], x, x];
-  $\frac{\text{Log}[2]}{\partial_x \text{Normal}[\text{modelFit}] 24}$ 
Text["R2 value for model fit:"]
modelFit["RSquared"]
```

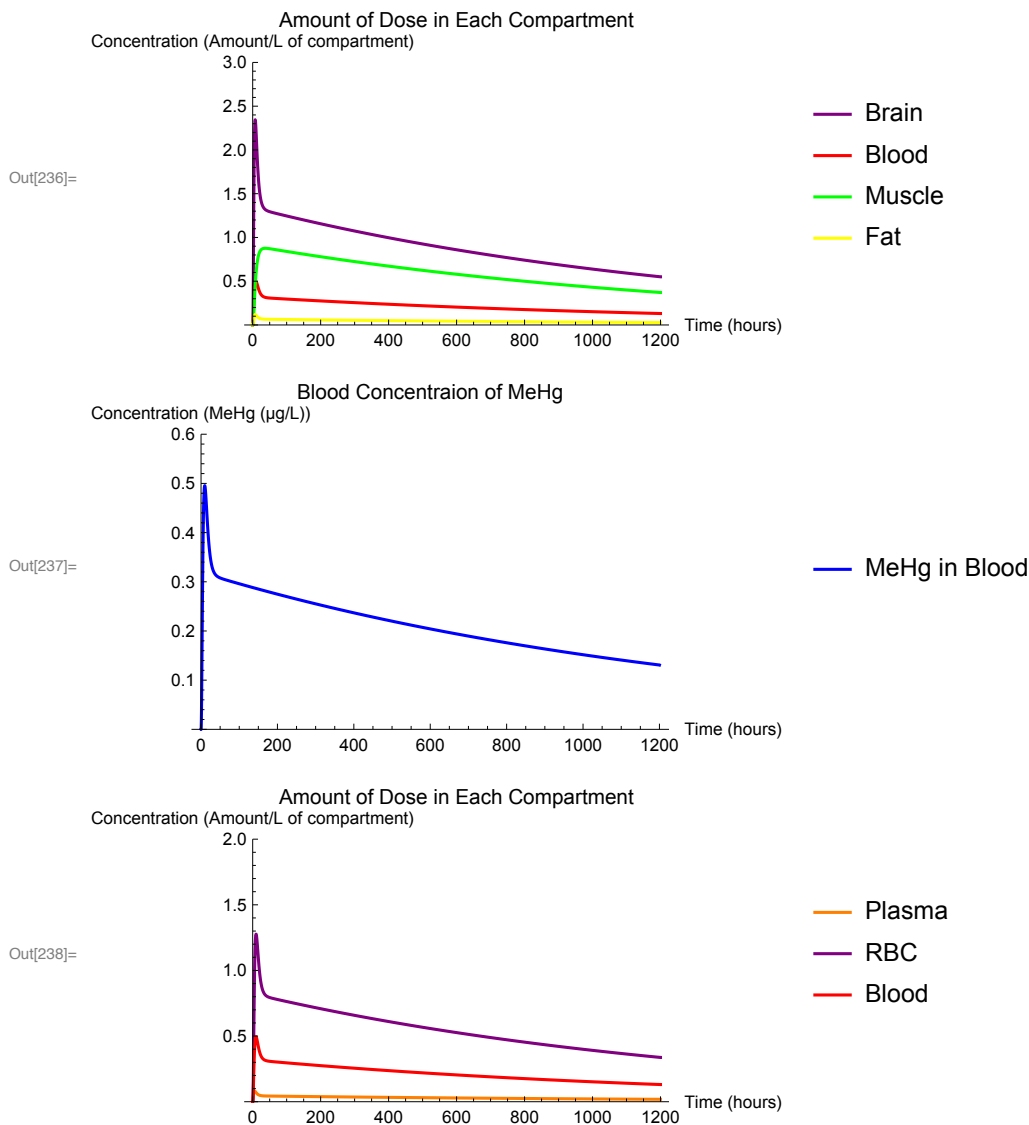

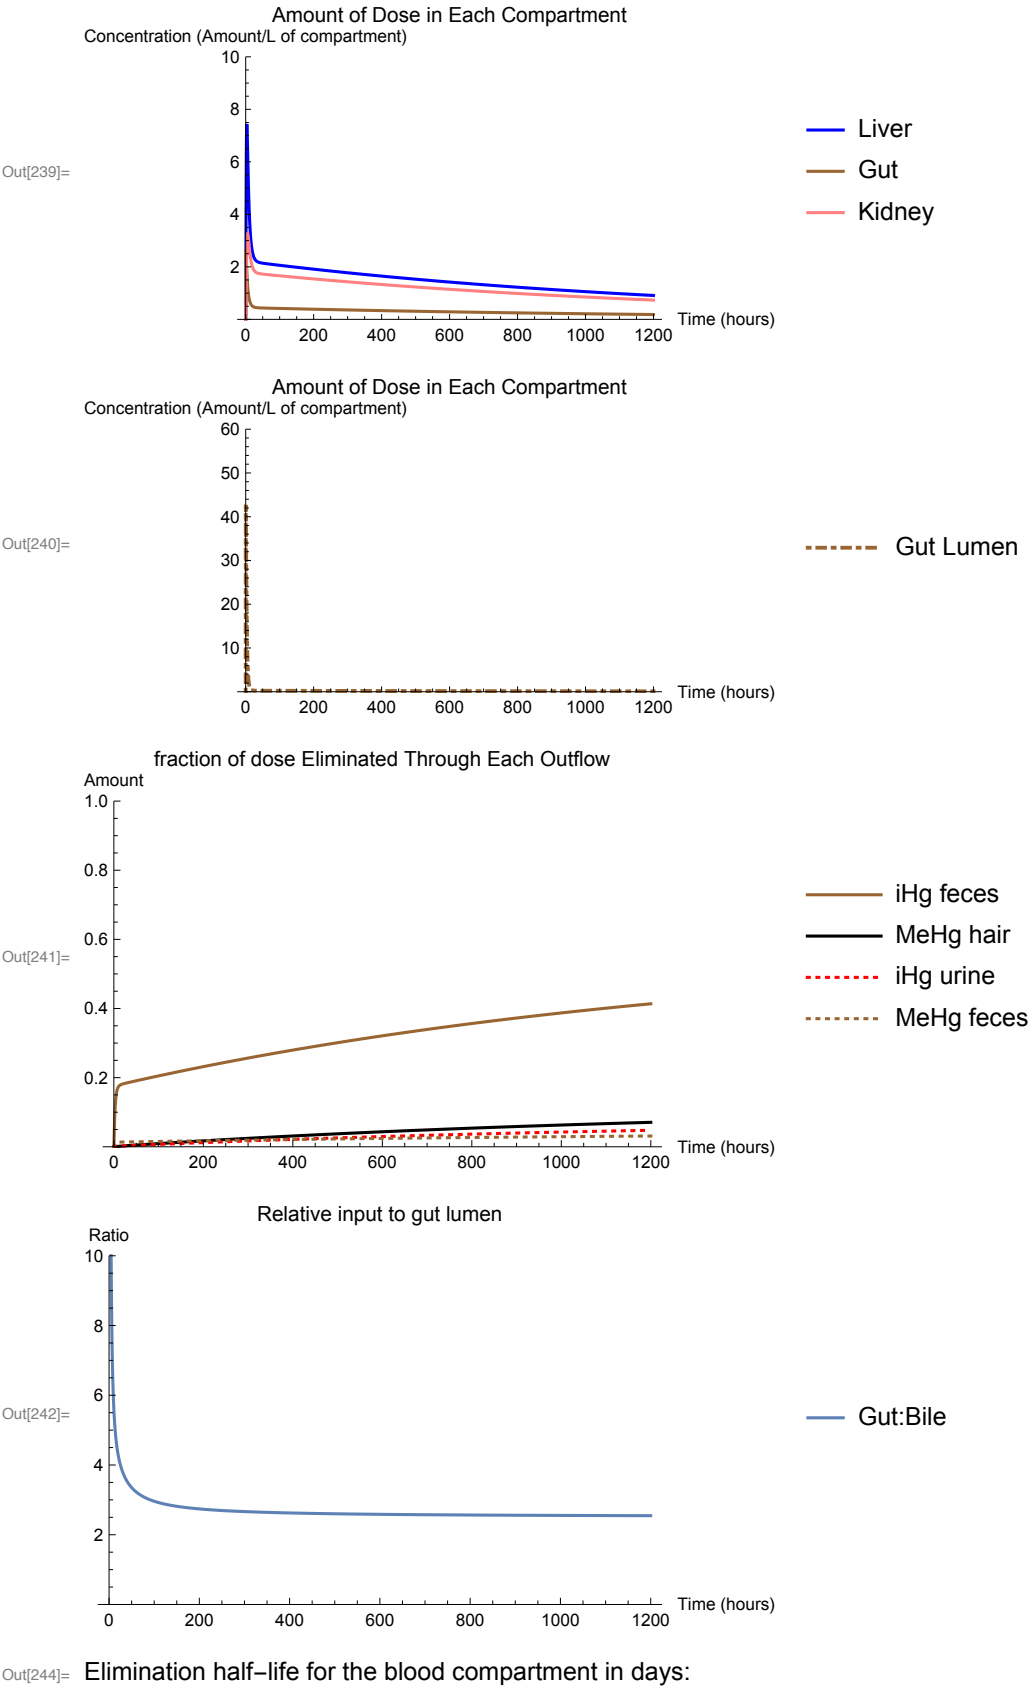

Out[245]= 38.9031

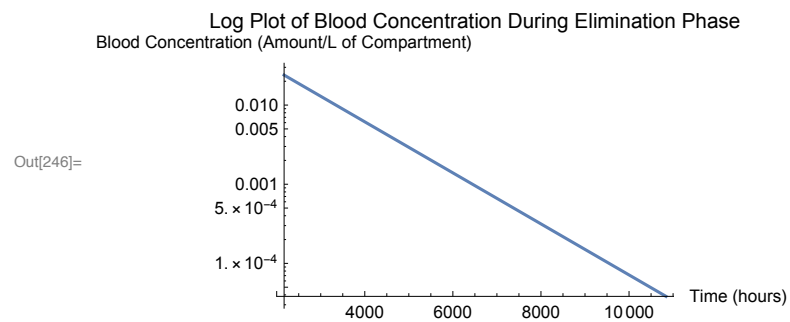

Out[247]= Half-life of blood concentration as calculated by best fit for log data:

Out[249]= 38.9031

Out[250]=  $R^2$  value for model fit:

Out[251]= 1.
